# Supplementary material for: Microwave-assisted HMF production from water-soluble sugars using betaine-based natural deep eutectic solvents (NADES)
Source: Royal Society of Chemistry journal article supplement (doi:10.1039/c9se01278h), 2020-01-01
Supplement: c9se01278h1.pdf [file c9se01278h1.pdf]

*Support Information for*

**Microwave-assisted HMF production from water-soluble sugars using betaine-based natural deep eutectic solvents (NADES)**

Gustavo R. Gomes and Julio C. Pastre

Institute of Chemistry, University of Campinas - UNICAMP, PO Box 6154, 13083-970  
Campinas, SP, Brazil

**Keywords:** HMF, natural deep eutectic solvent, betaine, fructose, sucrose

## Summary

### List of Figures

|                                                                                                                                                                                 |    |
|---------------------------------------------------------------------------------------------------------------------------------------------------------------------------------|----|
| <b>Figure S1.</b> GC-MS analysis of fructose dehydration using BHC/CA/H <sub>2</sub> O under conventional heating                                                               | 4  |
| <b>Figure S2.</b> Pareto chart of the 2 <sup>2</sup> full factorial design for fructose dehydration under microwave irradiation.                                                | 6  |
| <b>Figure S3.</b> Contour graphic of the 2 <sup>2</sup> full factorial design for fructose dehydration under microwave irradiation.                                             | 7  |
| <b>Figure S4.</b> Pareto chart of the 2 <sup>2</sup> full factorial design for sucrose dehydration under microwave irradiation.                                                 | 8  |
| <b>Figure S5.</b> Contour graphic of the 2 <sup>2</sup> full factorial design for sucrose dehydration under microwave irradiation.                                              | 9  |
| <b>Figure S6.</b> GC-MS analysis of sucrose dehydration mediated by NADES under microwave irradiation.                                                                          | 10 |
| <b>Figure S7.</b> Thermal analysis of BHC/MA/H <sub>2</sub> O (A) TG-DSC-DTG and (B) TG-MS                                                                                      | 12 |
| <b>Figure S8.</b> (A) GC/MS analysis of ethyl acetate fraction of BHC/MA/H <sub>2</sub> O thermal degradation experiments (B) Reaction scheme of decarboxylation of malic acid. | 14 |
| <b>Figure S9.</b> Thermal analysis of BHC/TA/H <sub>2</sub> O (A) TG-DSC-DTG and (B) TG-MS                                                                                      | 15 |
| <b>Figure S10.</b> Reaction schemes of thermal degradation of tartaric acid forming (A) glyoxal and (B) acetic and pyruvic acids.                                               | 17 |
| <b>Figure S11.</b> Thermal analysis of BHC/CA/H <sub>2</sub> O (A) TG-DSC-DTG and (B) TG-MS                                                                                     | 18 |
| <b>Figure S12.</b> Reaction scheme of thermal degradation of citric acid forming (A) acetone and (B) itaconic and citraconic anhydrides.                                        | 20 |
| <b>Figure S13.</b> GC/MS analysis of (A) ethyl acetate fraction of BHC/CA/H <sub>2</sub> O thermal degradation experiments and (B) citraconic anhydride standard.               | 21 |

**List of Tables**

**Table 1.** ANOVA analysis of the  $2^2$  full factorial design for fructose dehydration under microwave irradiation. 5

**Table 2.** ANOVA analysis of the  $2^2$  full factorial design for sucrose dehydration under microwave irradiation. 5

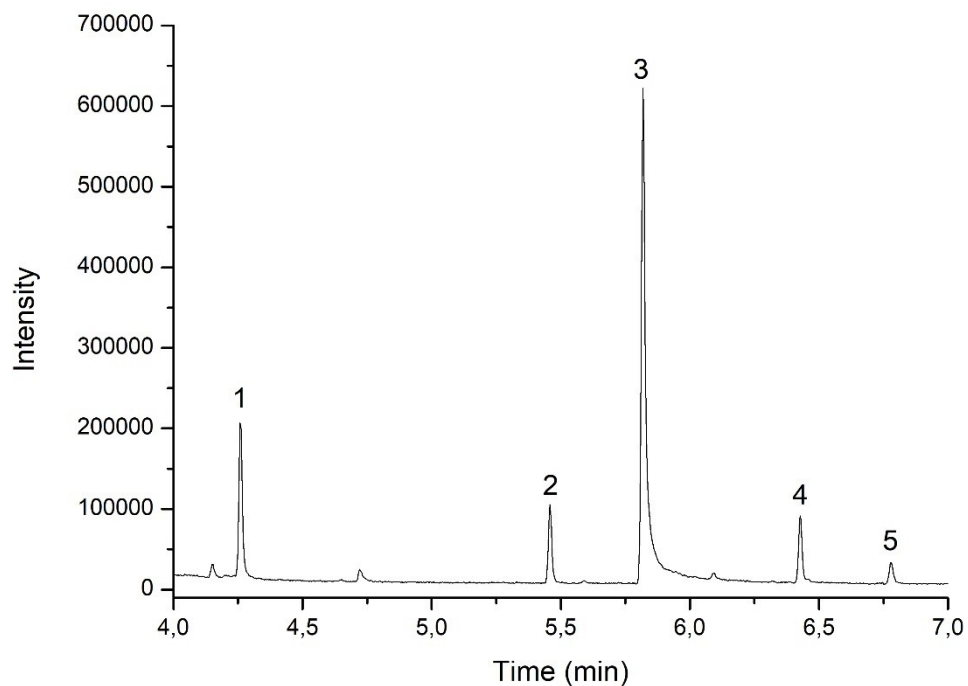

| Peak | t <sub>R</sub> (min) | Compound                                                                                                          | NIST similarity index (%) |
|------|----------------------|-------------------------------------------------------------------------------------------------------------------|---------------------------|
| 1    | 4,26                 | 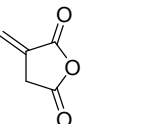<br>Itaconic anhydride         | 77                        |
| 2    | 5,46                 | unknown                                                                                                           |                           |
| 3    | 5,82                 | <br>HMF                        | 96                        |
| 4    | 6,43                 | <br>5-(acetoxymethyl)-furfural | 95                        |
| 5    | 6,78                 | <br>Aconitic acid              | 78                        |

**Figure S1.** GC-MS analysis of fructose dehydration using BHC/CA/H<sub>2</sub>O under conventional heating.

**Table S1.** ANOVA analysis of the 2<sup>2</sup> full factorial design for fructose dehydration under microwave irradiation.

**ANOVA for selected factorial model**

**Analysis of variance table [Partial sum of squares - Type III]**

| Source            | Sum of Squares | df | Mean Square | F Value | p-value Prob > F |             |
|-------------------|----------------|----|-------------|---------|------------------|-------------|
| Block             | 2325.76        | 1  | 2325.76     |         |                  |             |
| Model             | 747.00         | 3  | 249.00      | 106.71  | 0.0093           | significant |
| A-<br>Temperature | 225.00         | 1  | 225.00      | 96.43   | 0.0102           |             |
| B-Time            | 81.00          | 1  | 81.00       | 34.71   | 0.0276           |             |
| AB                | 441.00         | 1  | 441.00      | 189.00  | 0.0052           |             |
| Pure Error        | 4.67           | 2  | 2.33        |         |                  |             |
| Cor Total         | 3077.43        | 6  |             |         |                  |             |

**Table S2.** ANOVA analysis of the 2<sup>2</sup> full factorial design for sucrose dehydration under microwave irradiation.

**ANOVA for selected factorial model**

**Analysis of variance table [Partial sum of squares - Type III]**

| Source            | Sum of Squares | df | Mean Square | F Value | p-value Prob > F |             |
|-------------------|----------------|----|-------------|---------|------------------|-------------|
| Block             | 613.44         | 1  | 613.44      |         |                  |             |
| Model             | 266.75         | 3  | 88.92       | 38.11   | 0.0257           | significant |
| A-<br>Temperature | 0.25           | 1  | 0.25        | 0.11    | 0.7745           |             |
| B-Time            | 210.25         | 1  | 210.25      | 90.11   | 0.0109           |             |
| AB                | 56.25          | 1  | 56.25       | 24.11   | 0.0391           |             |
| Pure Error        | 4.67           | 2  | 2.33        |         |                  |             |
| Cor Total         | 884.86         | 6  |             |         |                  |             |

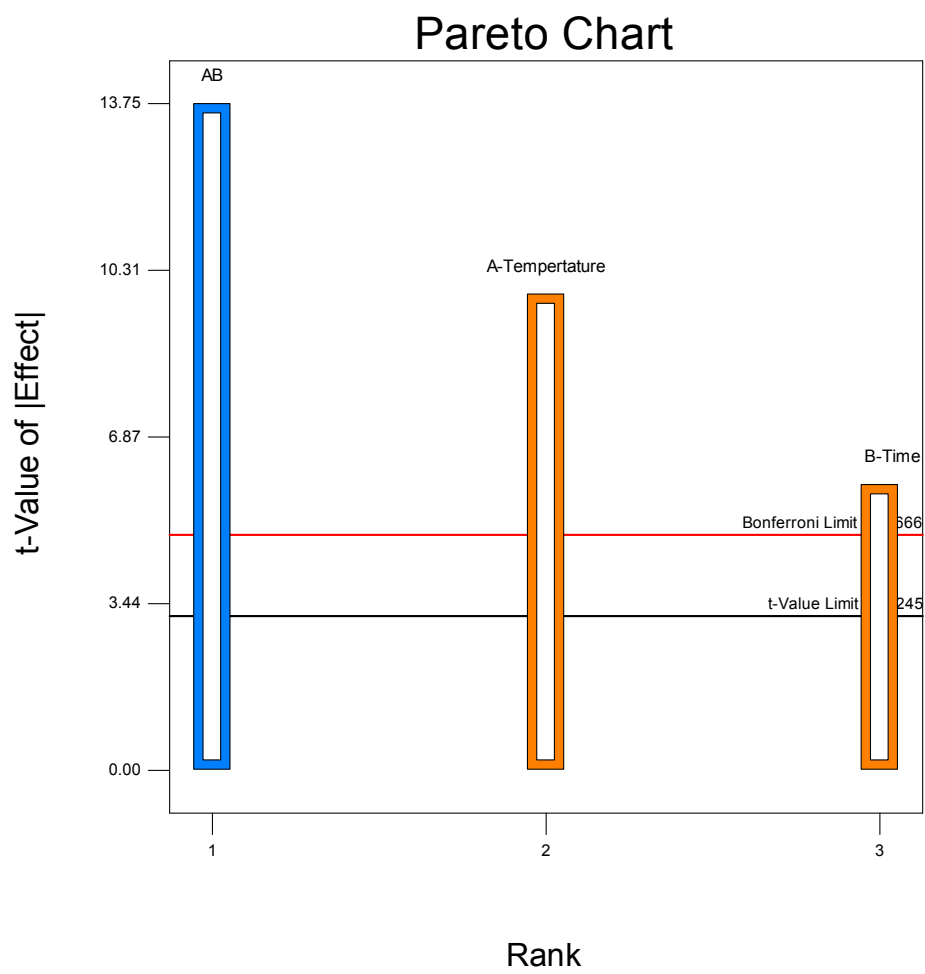

**Figure S2.** Pareto chart of the  $2^2$  full factorial design for fructose dehydration under microwave irradiation.

Design-Expert® Software

Factor Coding: Actual

HMF (%)

● Design Points

82

21

X1 = A: Temperature

X2 = B: Time

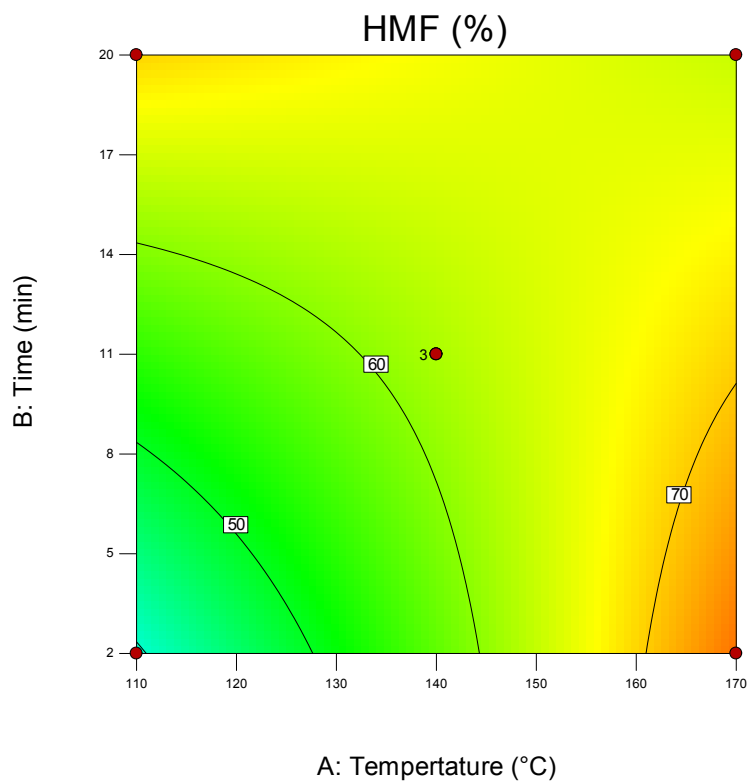

**Figure S3.** Contour graphic of the  $2^2$  full factorial design for fructose dehydration under microwave irradiation.

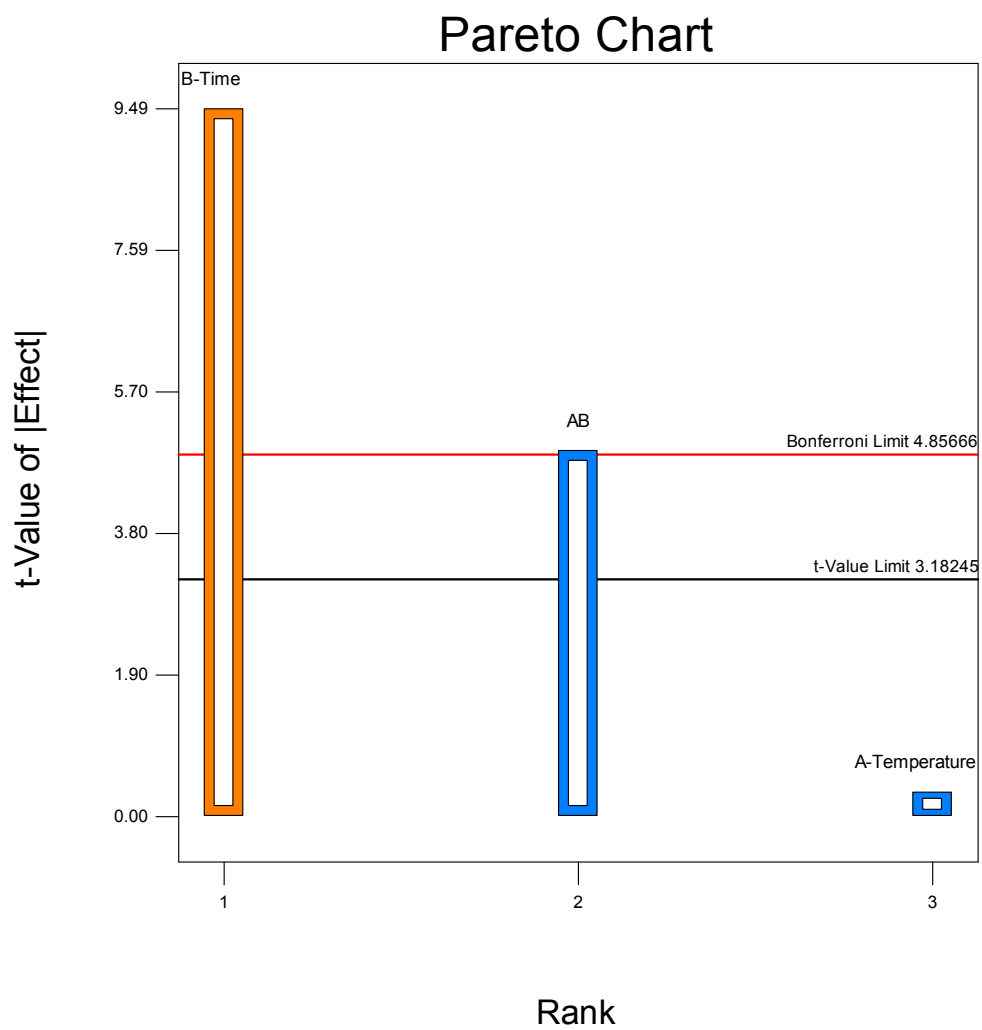

**Figure S4.** Pareto chart of the  $2^2$  full factorial design for sucrose dehydration under microwave irradiation.



Design-Expert® Software  
Factor Coding: Actual

HMF (%)

● Design Points

73

42

X1 = A: Temperature

X2 = B: Time

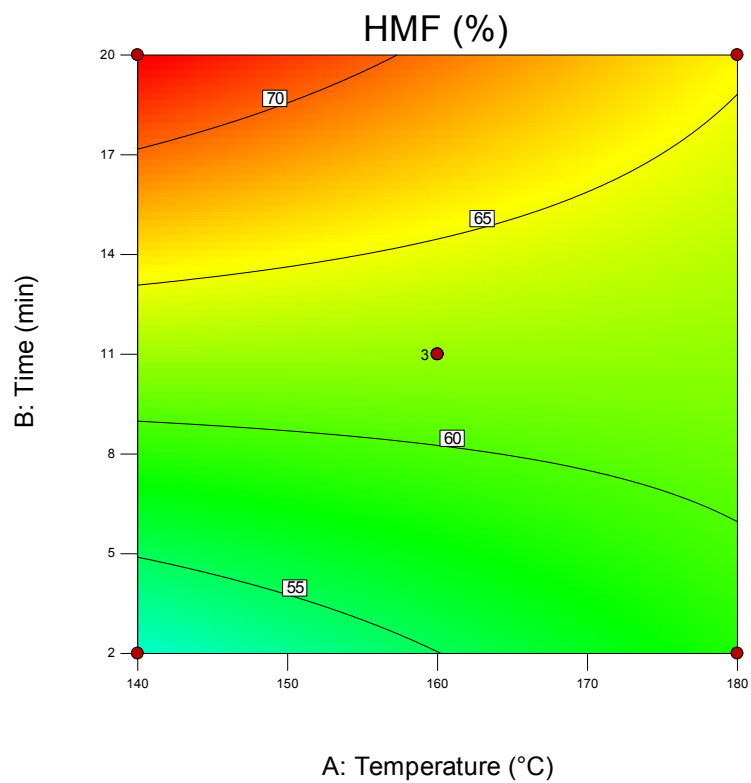

**Figure S5.** Contour graphic of the  $2^2$  full factorial design for sucrose dehydration under microwave irradiation

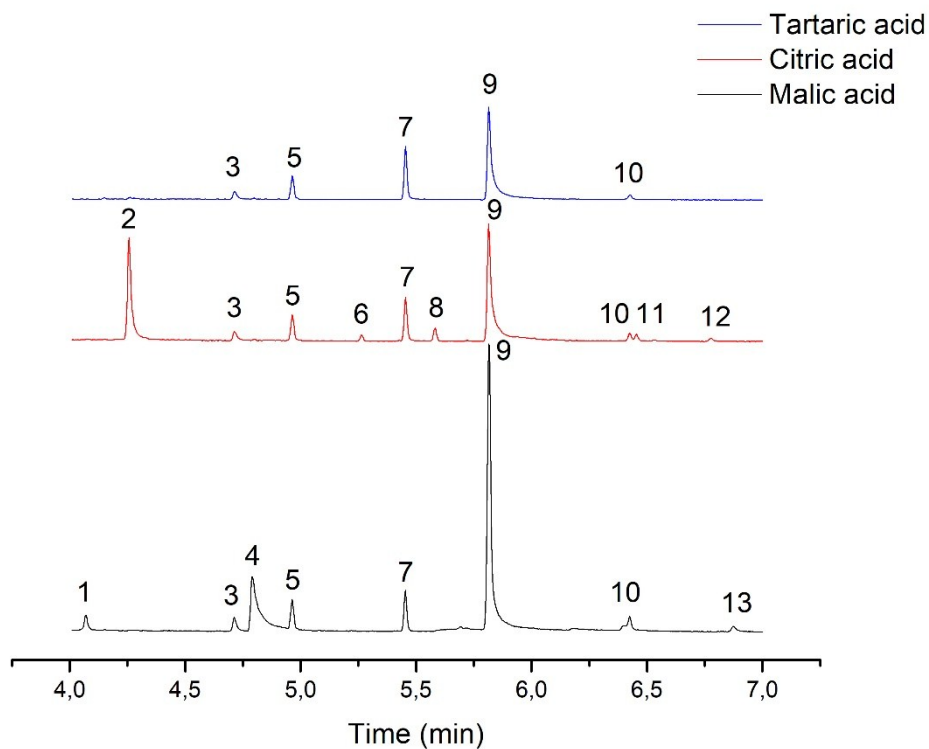

| Peak | t <sub>R</sub> (min) | Compound                                                                                                             | NIST similarity index (%) |
|------|----------------------|----------------------------------------------------------------------------------------------------------------------|---------------------------|
| 1    | 4,07                 | <br>Succinic anhydride            | 77                        |
| 2    | 4,26                 | <br>Itaconic anhydride            | 66                        |
| 3    | 4,71                 | <br>Methyl 3-furoate              | 55                        |
| 4    | 4,79                 | <br>Acetaldehyde                  | 77                        |
| 5    | 4,96                 | <br>Levoglucosenone               | 96                        |
| 6    | 5,26                 | <br>3-(tert-butyl)furan-2,5-dione | 53                        |
| 7    | 5,46                 | unknown                                                                                                              |                           |
| 8    | 5,58                 | <br>unknown                       | 90                        |

|    |      | 3-methyl-4-propylfuran-2,5-dione                                                                                |    |
|----|------|-----------------------------------------------------------------------------------------------------------------|----|
| 9  | 5,82 | 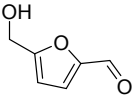<br>HMF                        | 96 |
| 10 | 6,43 | <br>5-(acetoxymethyl)-furfural | 90 |
| 11 | 6,46 | <br>2-butylidenemalonic acid   | 33 |
| 12 | 6,78 | <br>Aconitic acid              | 63 |
| 13 | 6,88 | Unknown                                                                                                         |    |

**Figure S6.** GC-MS analysis of sucrose dehydration mediated by NADES under microwave irradiation.

A)

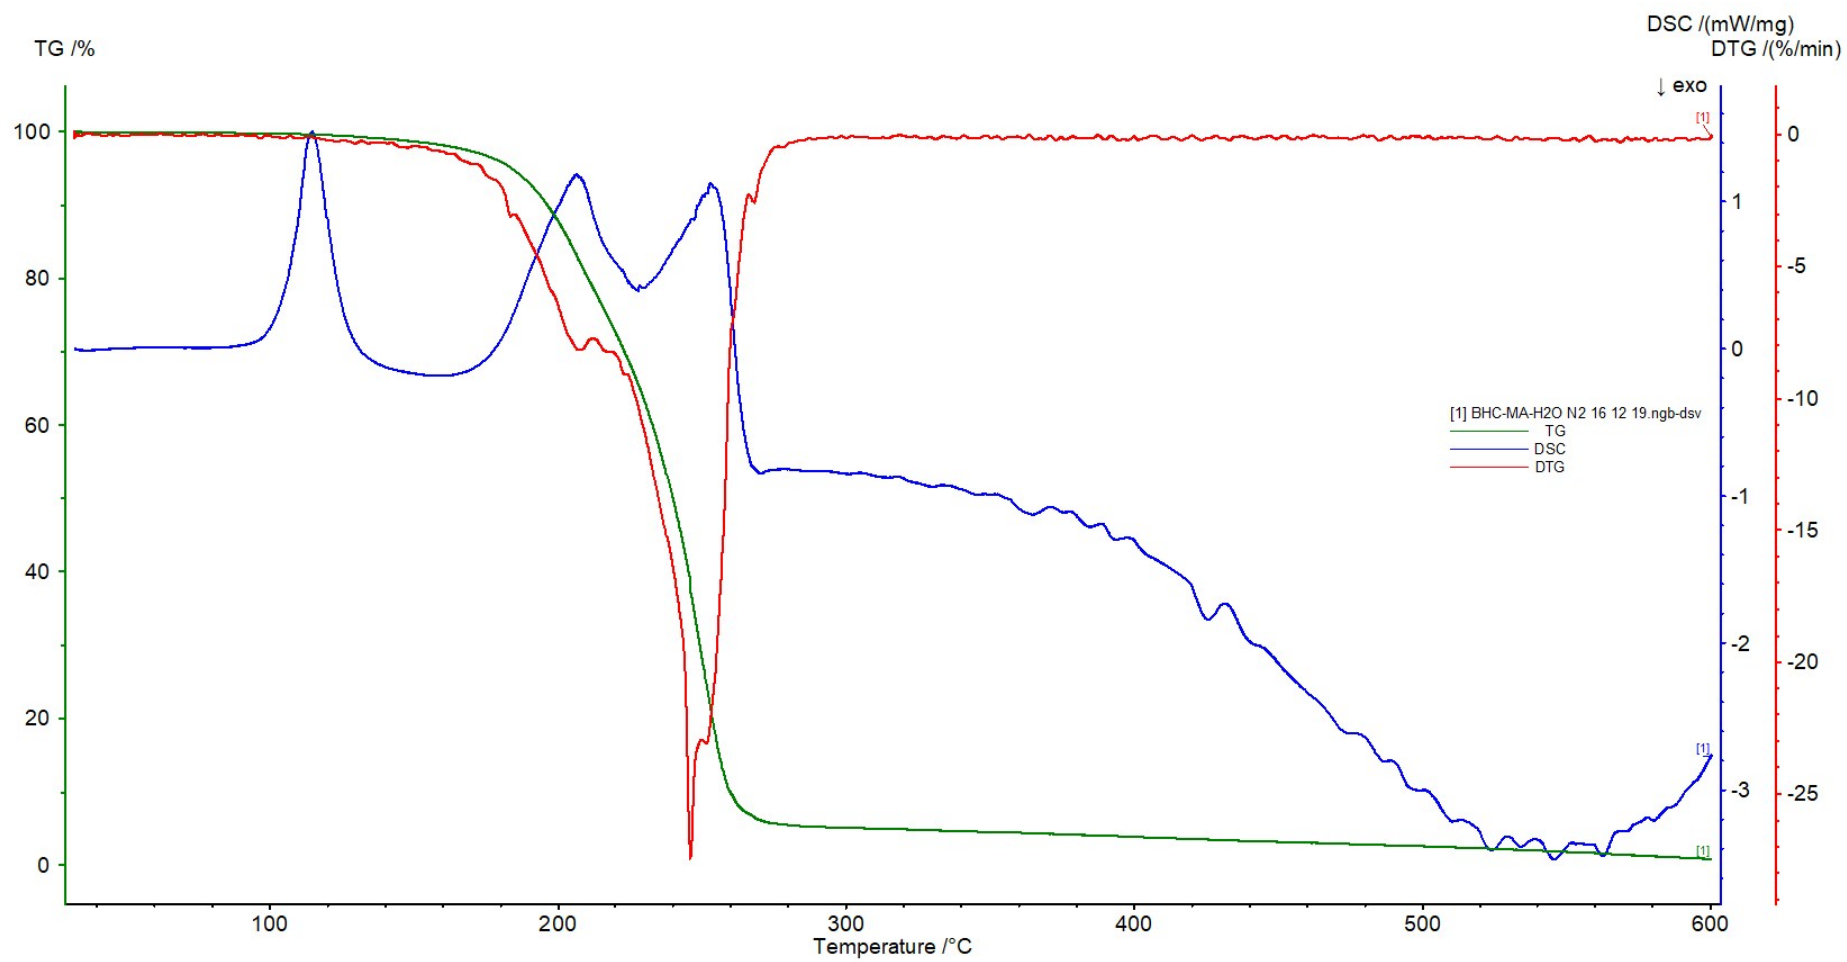

B)

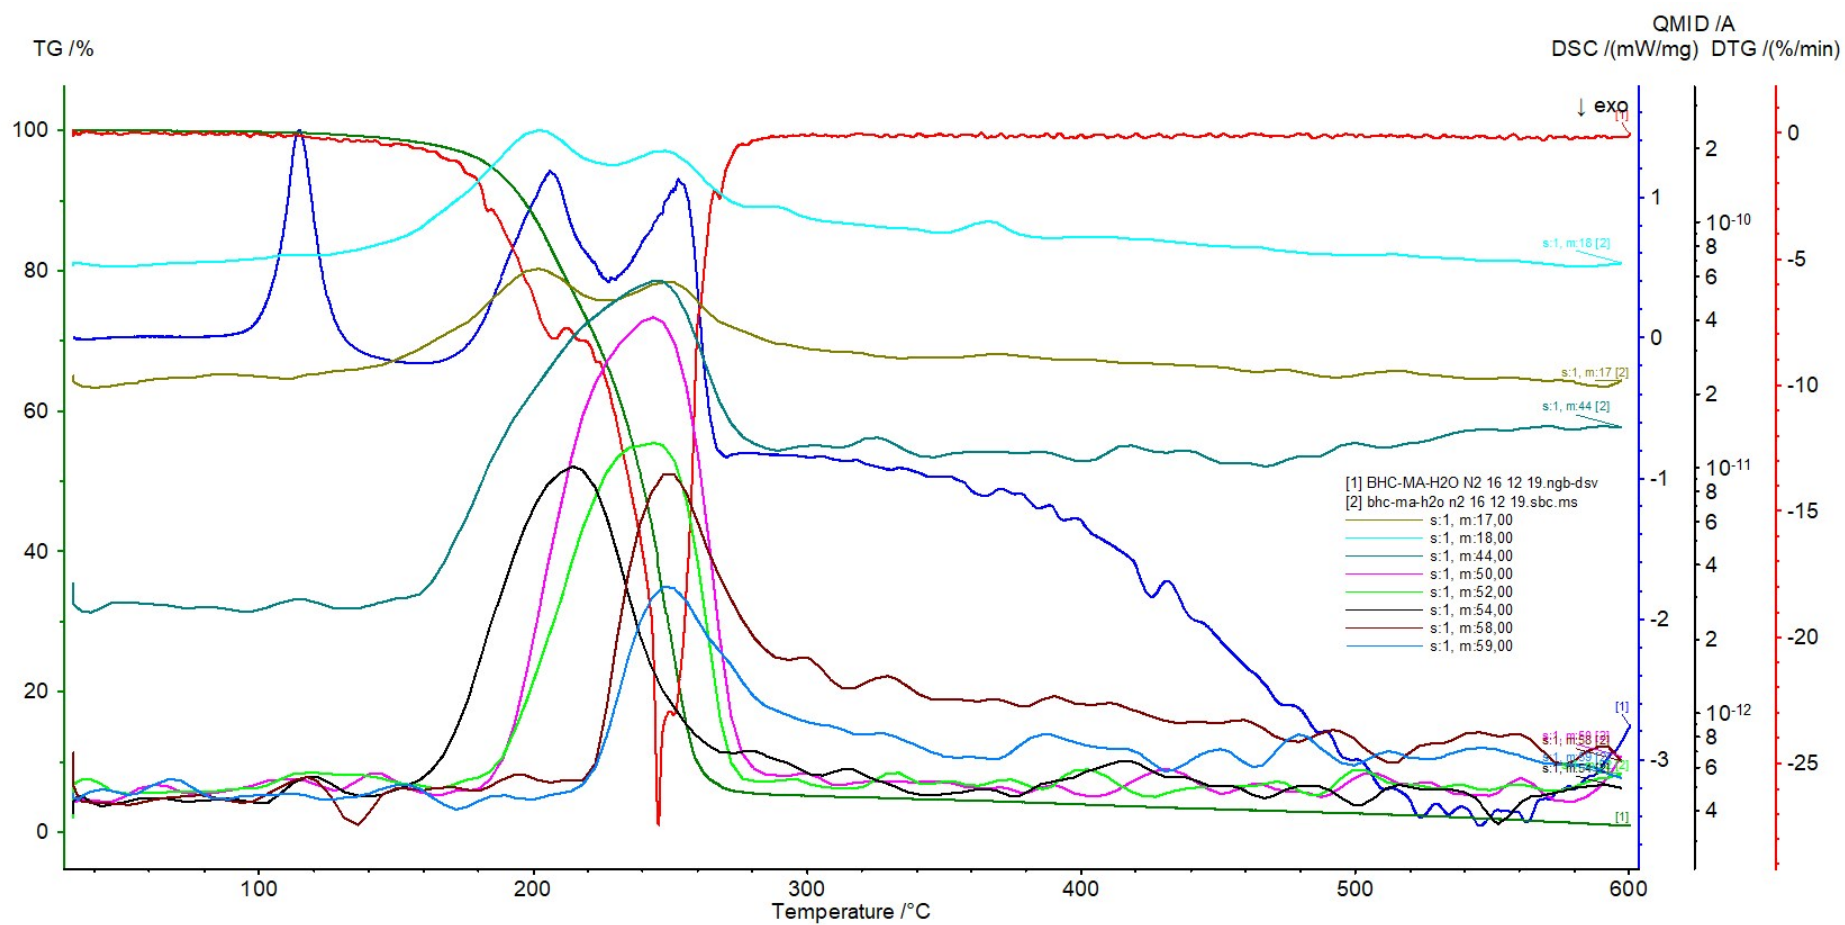

Figure S7. Thermal analysis of BHC/MA/H<sub>2</sub>O (A) TG-DSC-DTG and (B) TG-MS

A)

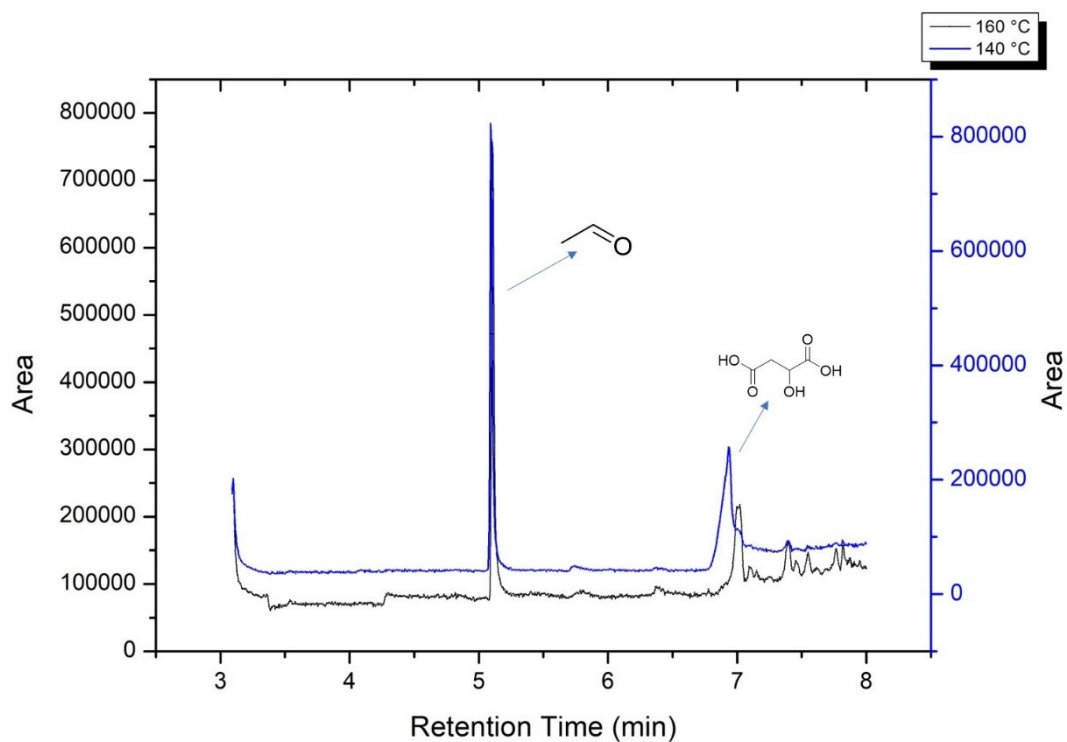

B)

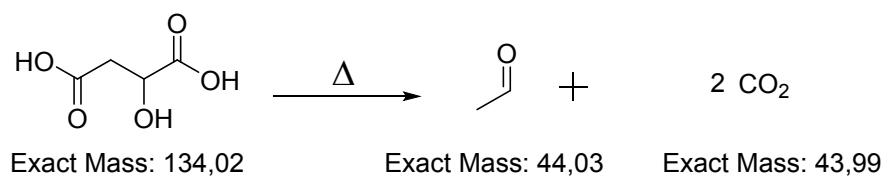

**Figure S8.** (A) GC-MS analysis of ethyl acetate fraction of BHC/MA/H<sub>2</sub>O thermal degradation experiments (B) Reaction scheme for the decarboxylation of malic acid.

A)

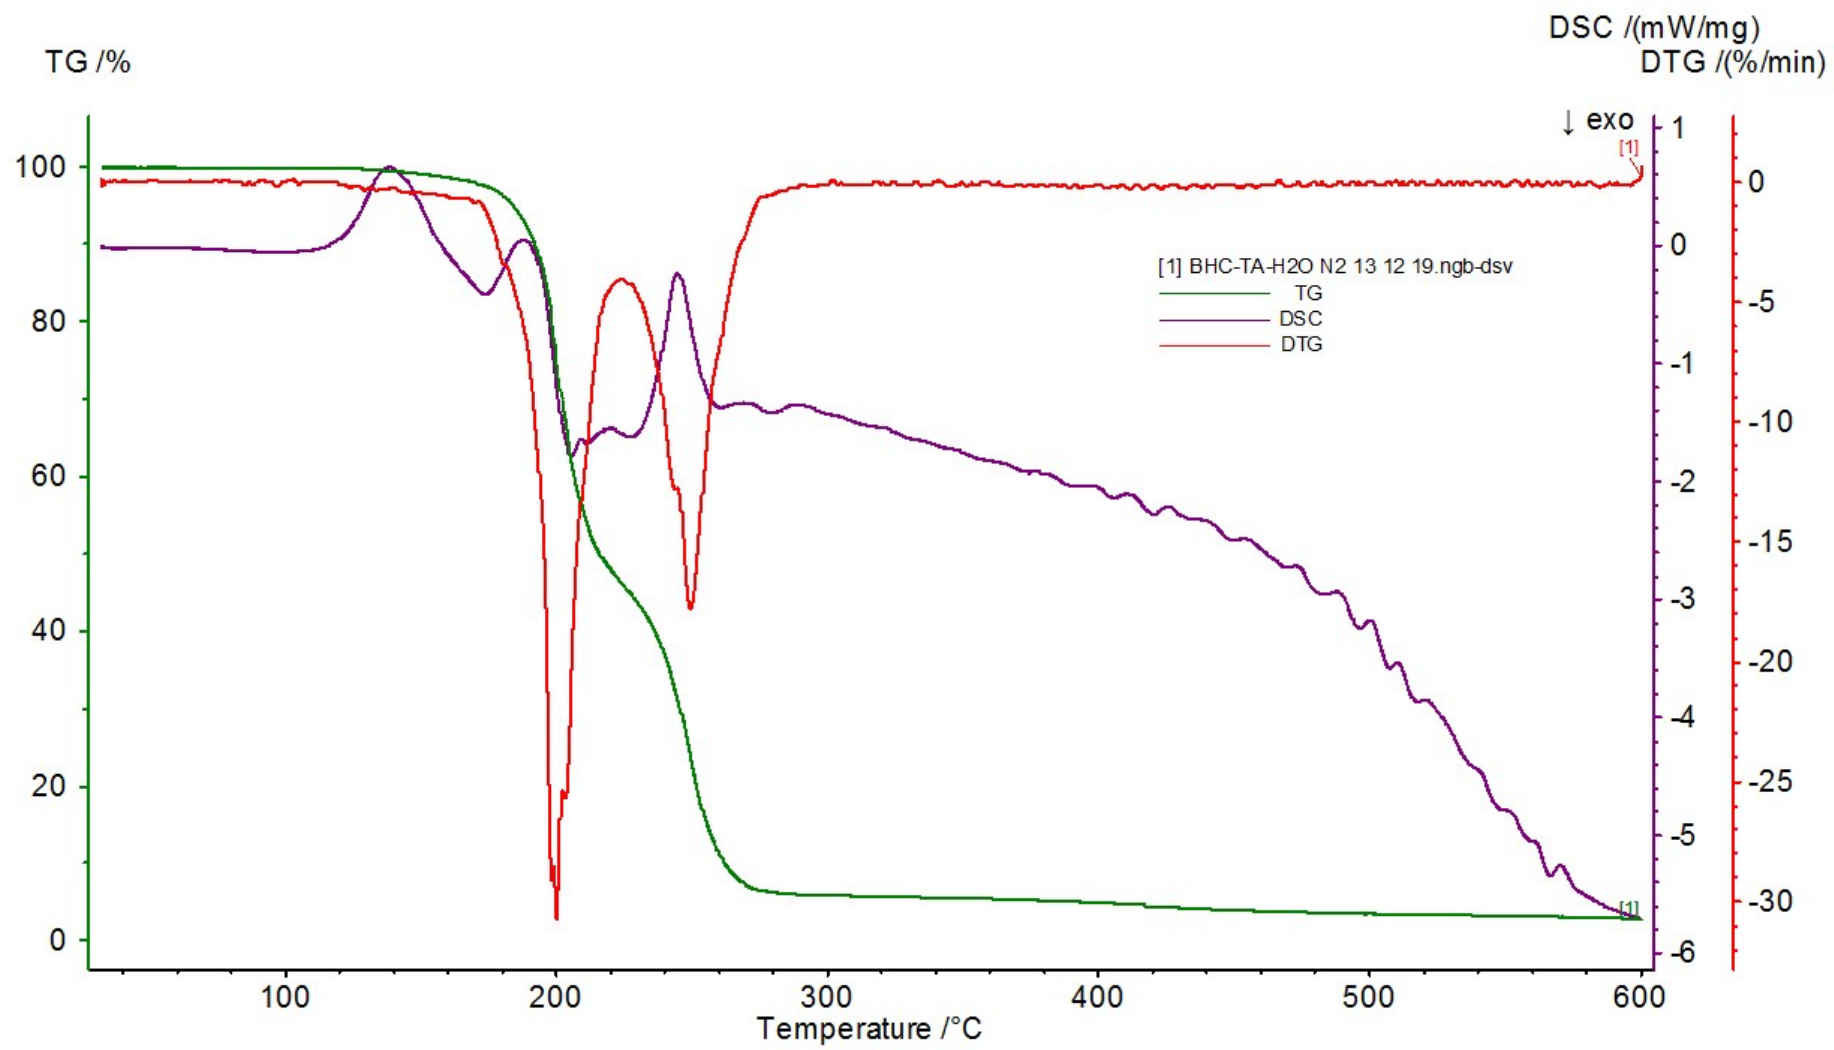

B)

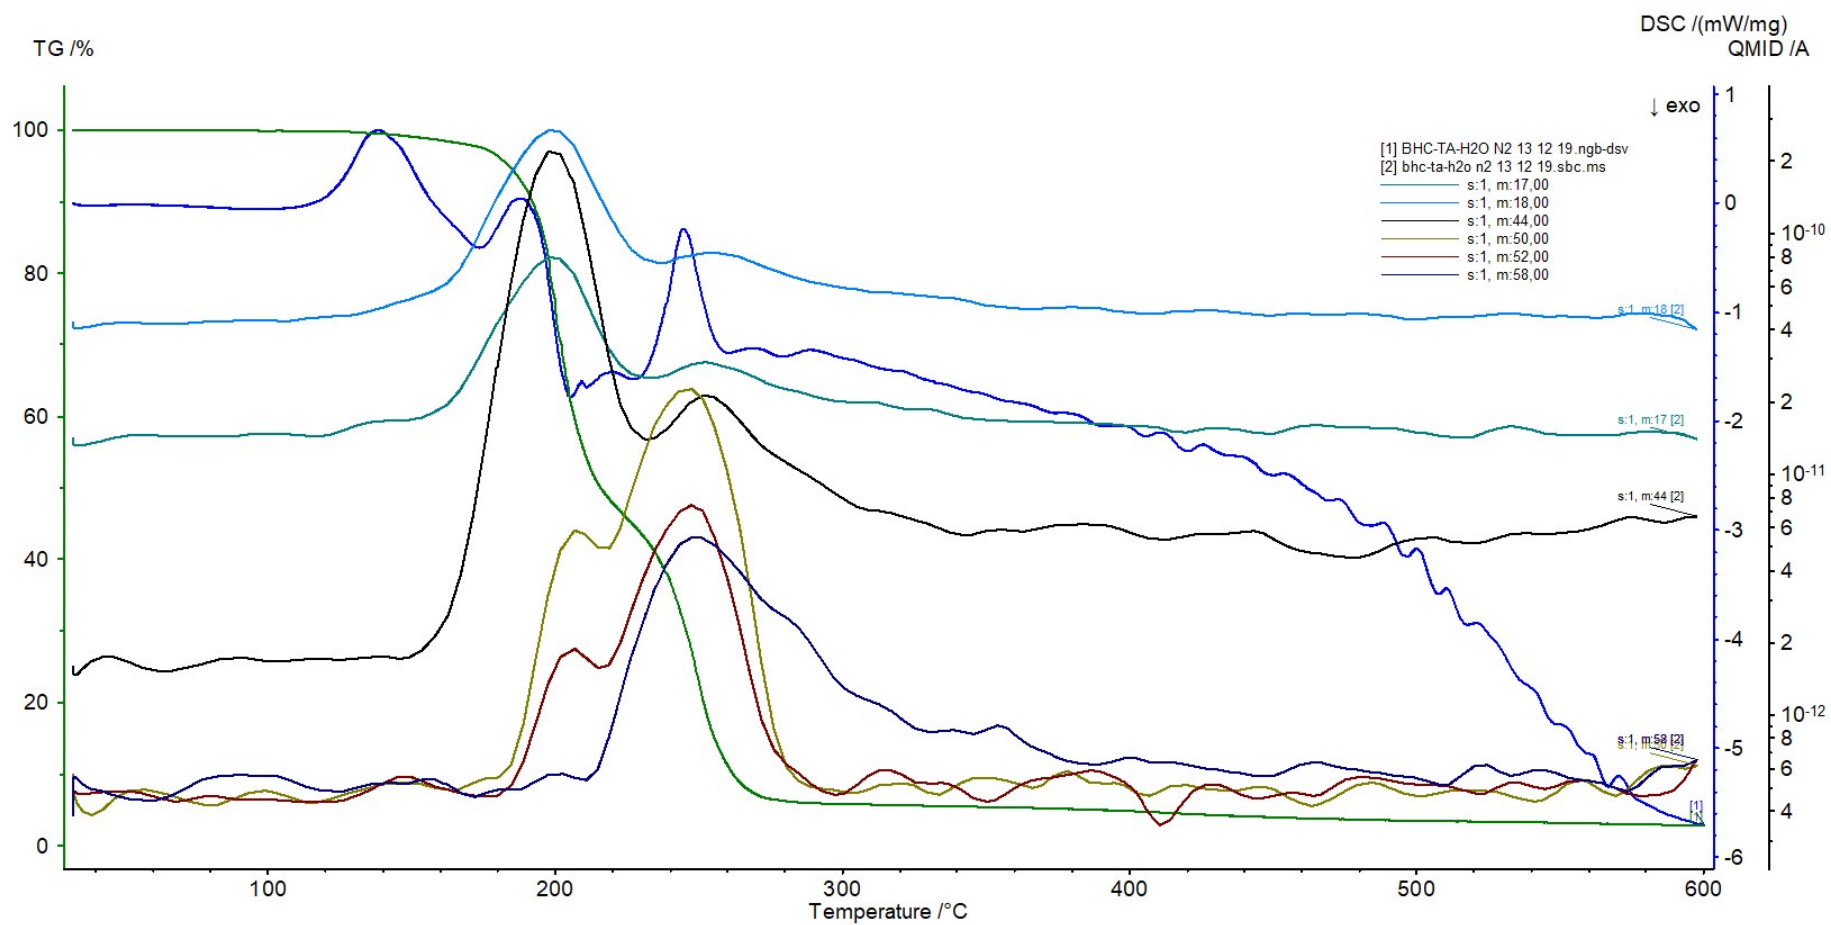

Figure S9. Thermal analysis of BHC/TA/H<sub>2</sub>O (A) TG-DSC-DTG and (B) TG-MS





A)

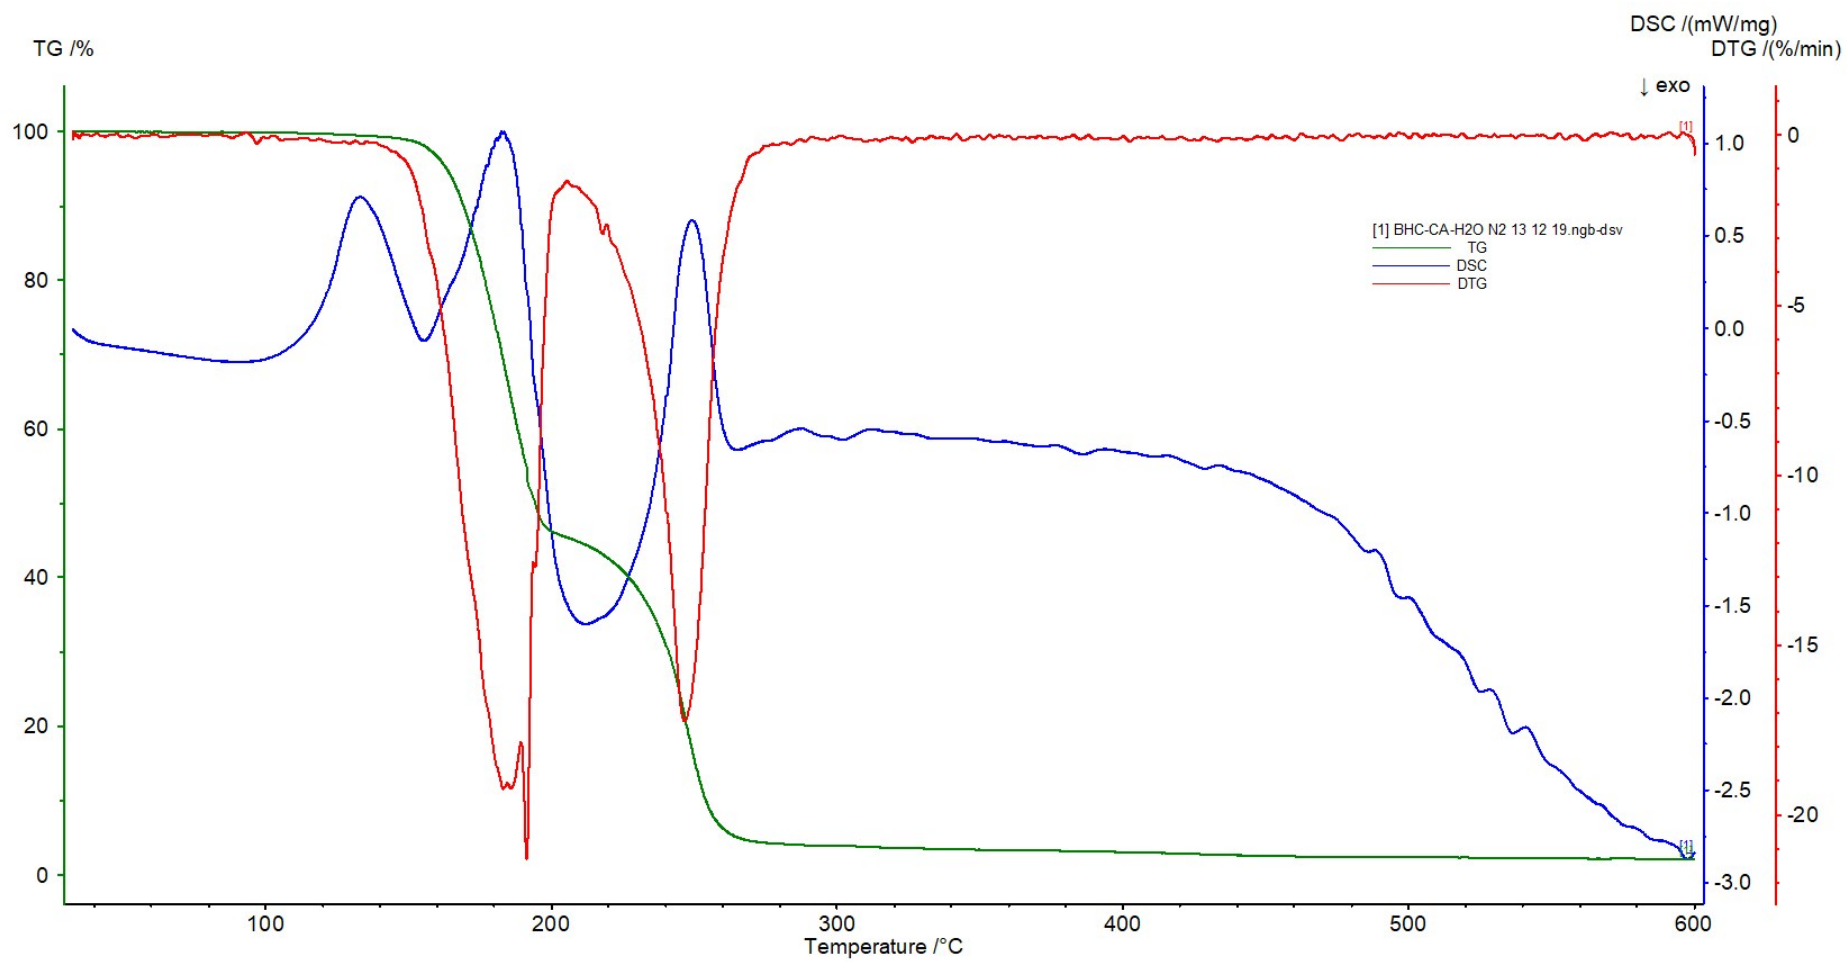

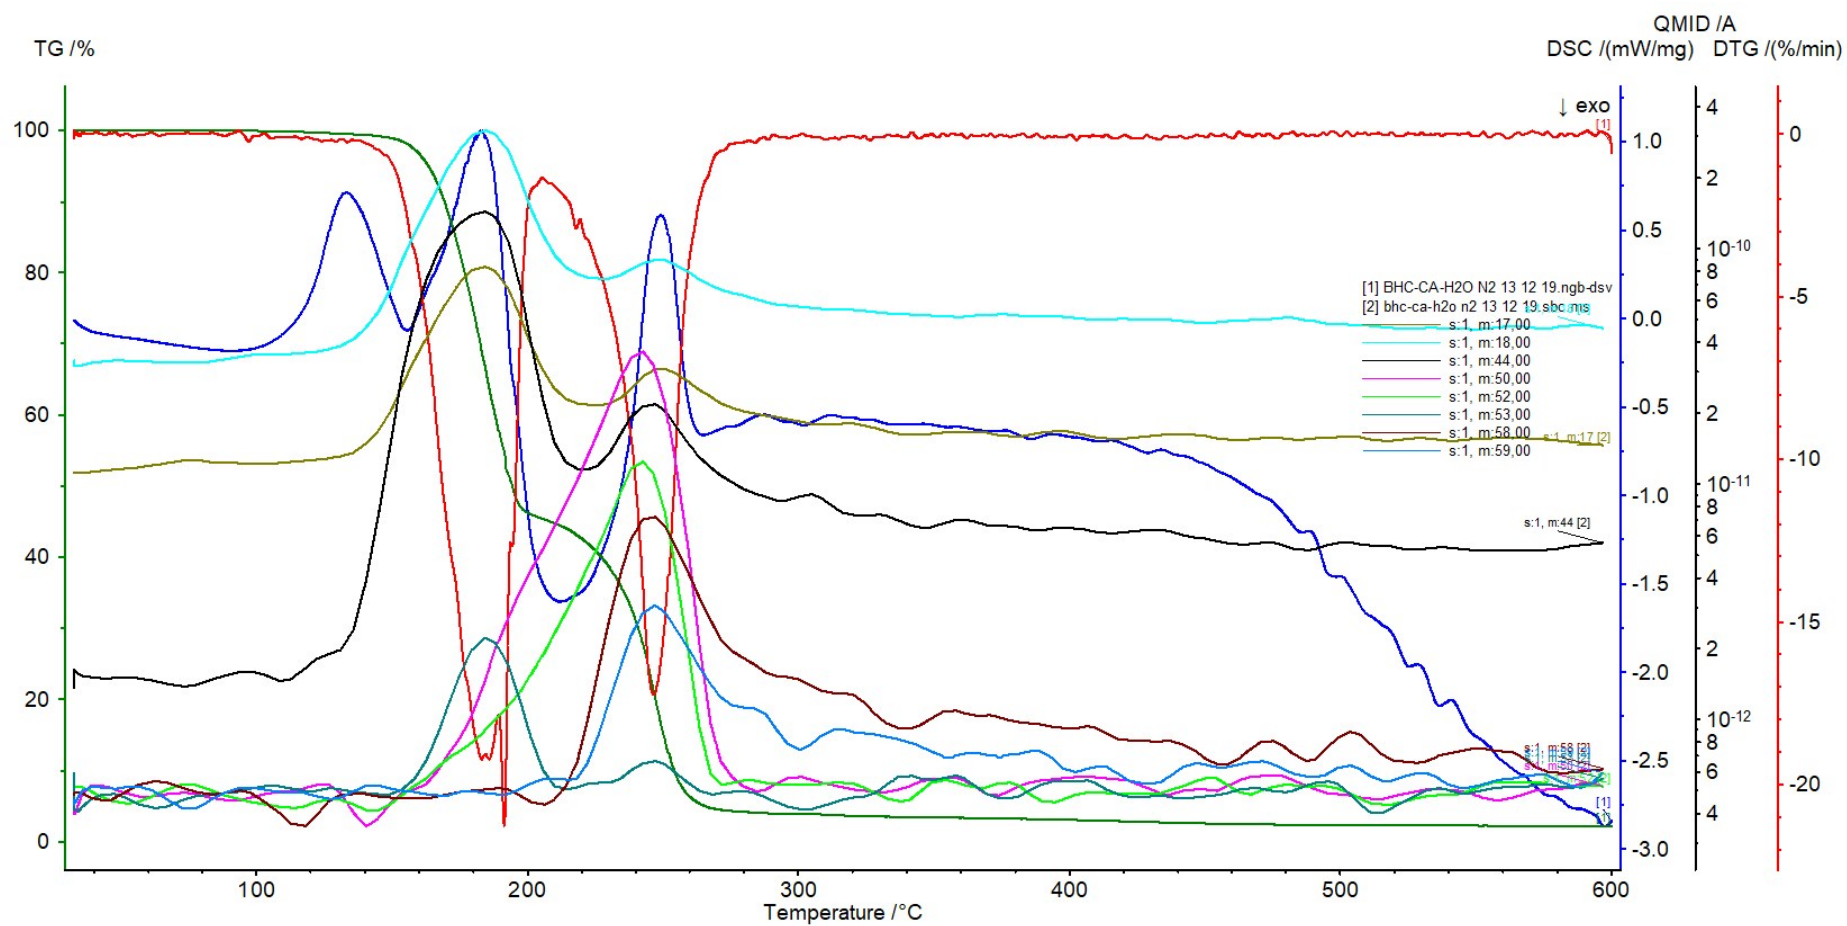

**Figure S11.** Thermal analysis of BHC/CA/H<sub>2</sub>O (A) TG-DSC-DTG and (B) TG-MS

A)

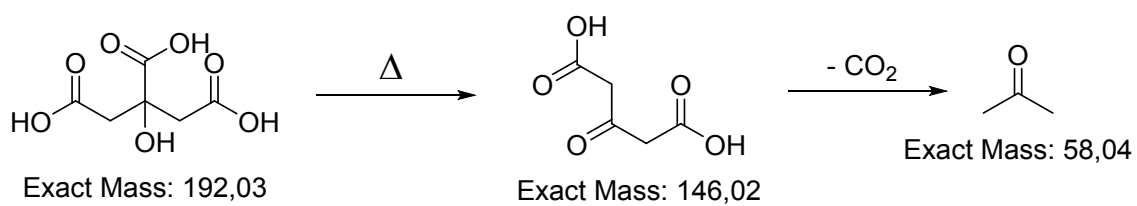

B)

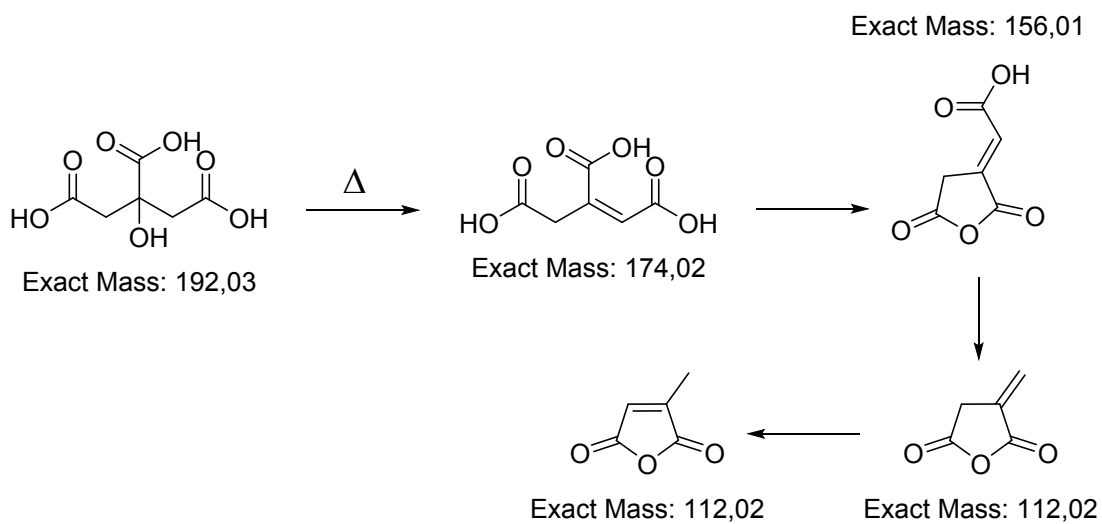

**Figure S12.** Reaction scheme of thermal degradation of citric acid forming (A) acetone and (B) itaconic and citraconic anhydrides.

A)

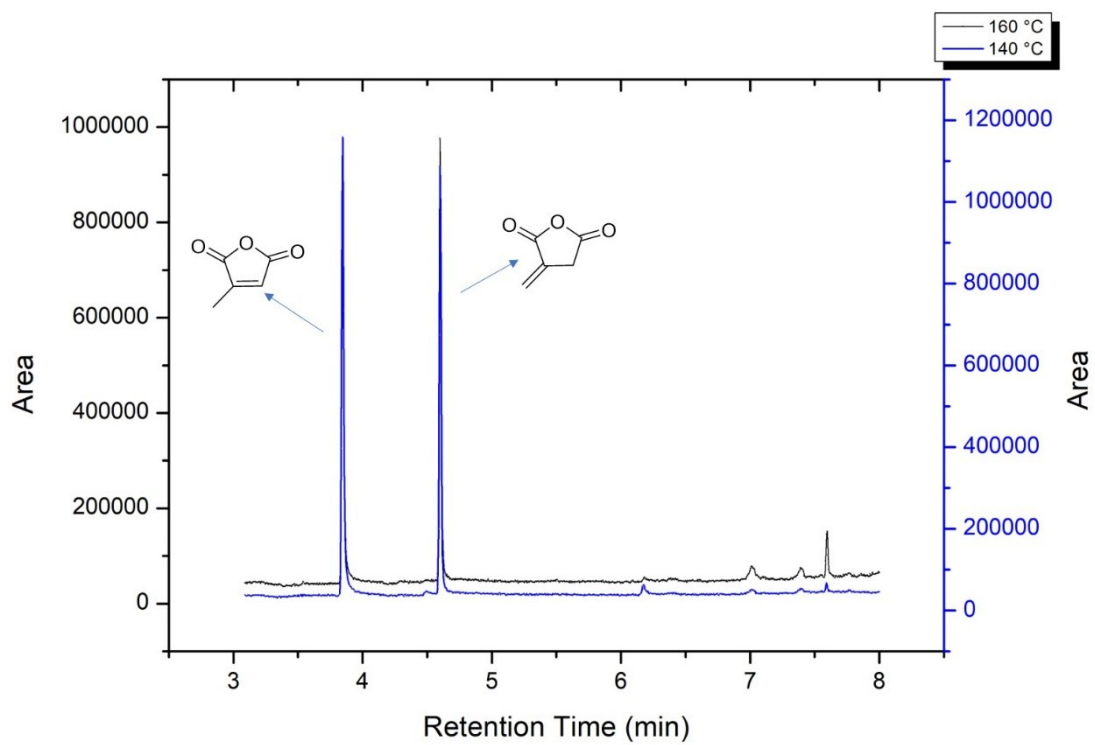

B)

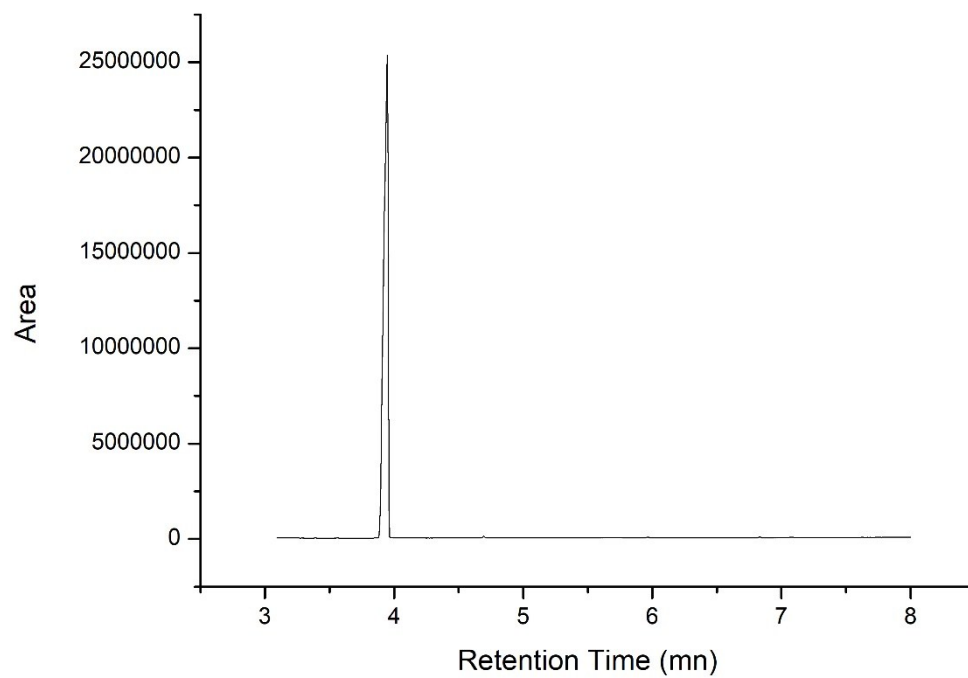

**Figure S13.** GC-MS analysis of (A) ethyl acetate fraction of BHC/CA/H<sub>2</sub>O thermal degradation experiments and (B) citraconic anhydride (authentic sample from commercial sources).
